# Supplementary material for: Impact of impurities in covalent organic frameworks on catalytic properties of supported isolated Pd complexes
Source: Royal Society of Chemistry journal article supplement (doi:10.1039/d5cy01181g), 2025-12-16
Supplement: d5cy01181g1.pdf [file d5cy01181g1.pdf]

## Supplementary Information

### Impact of Impurities in Covalent Organic Frameworks on Catalytic Properties of Supported Isolated Pd Complexes

**Ruby Dane Deeter<sup>1</sup>, Hridita Purba Saha<sup>2</sup>, Ayman M. Karim<sup>2\*</sup>, and Hani El-Kaderi<sup>1\*</sup>**

<sup>1</sup> Department of Chemistry, Virginia Commonwealth University, Richmond, VA 23284-2006, USA

<sup>2</sup> Department of Chemical Engineering, University of Virginia, Charlottesville, VA 22901, USA

#### Corresponding Author

\*Email: [helkaderi@vcu.edu](mailto:helkaderi@vcu.edu), [pqg9zx@virginia.edu](mailto:pqg9zx@virginia.edu)

<sup>a</sup>Authors contributed equally

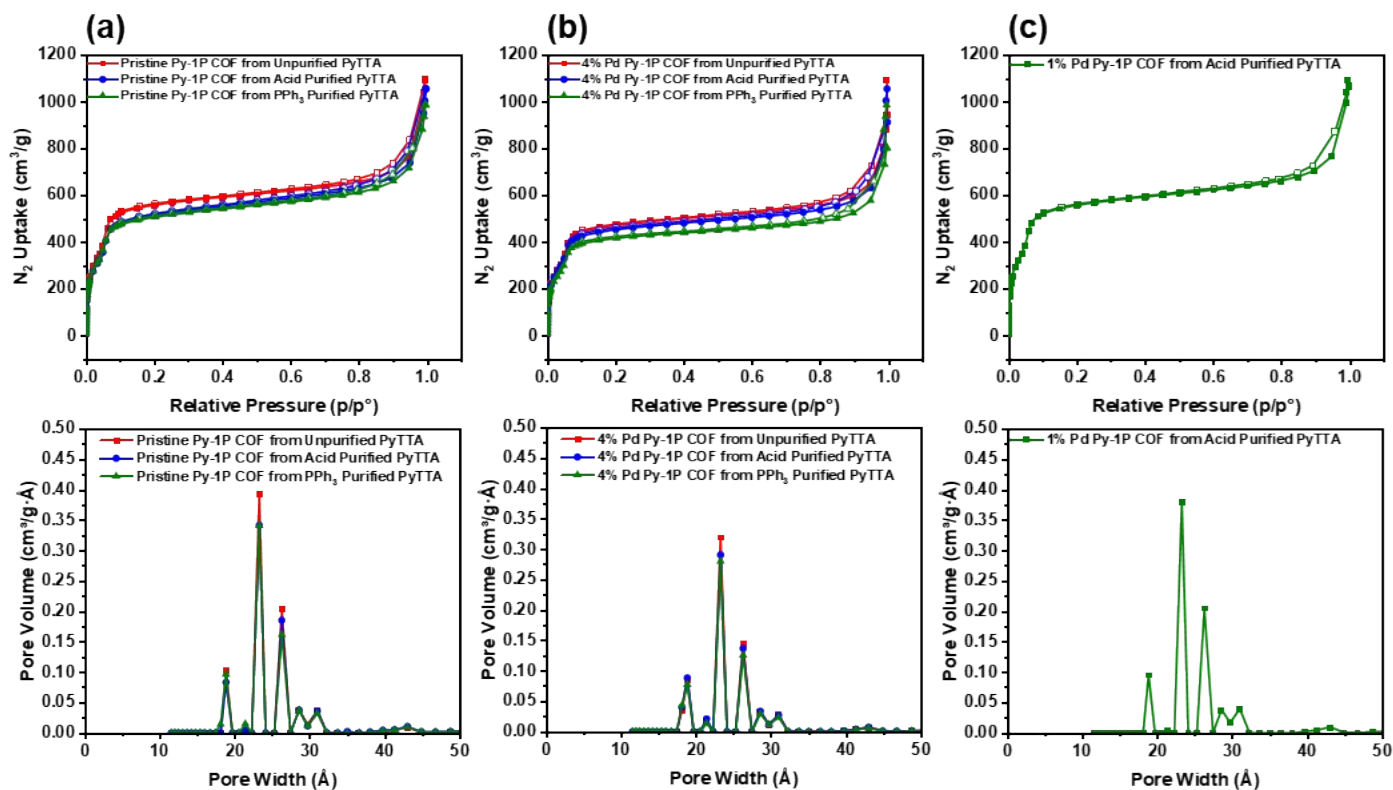

**Figure S1:** (Top) N<sub>2</sub> absorption isotherm and (bottom) pore size distribution of (a) pristine, (b) 4 wt. % Pd, and (c) 1 wt. % Pd Py-1P COF samples from PyTTA of various purifications.

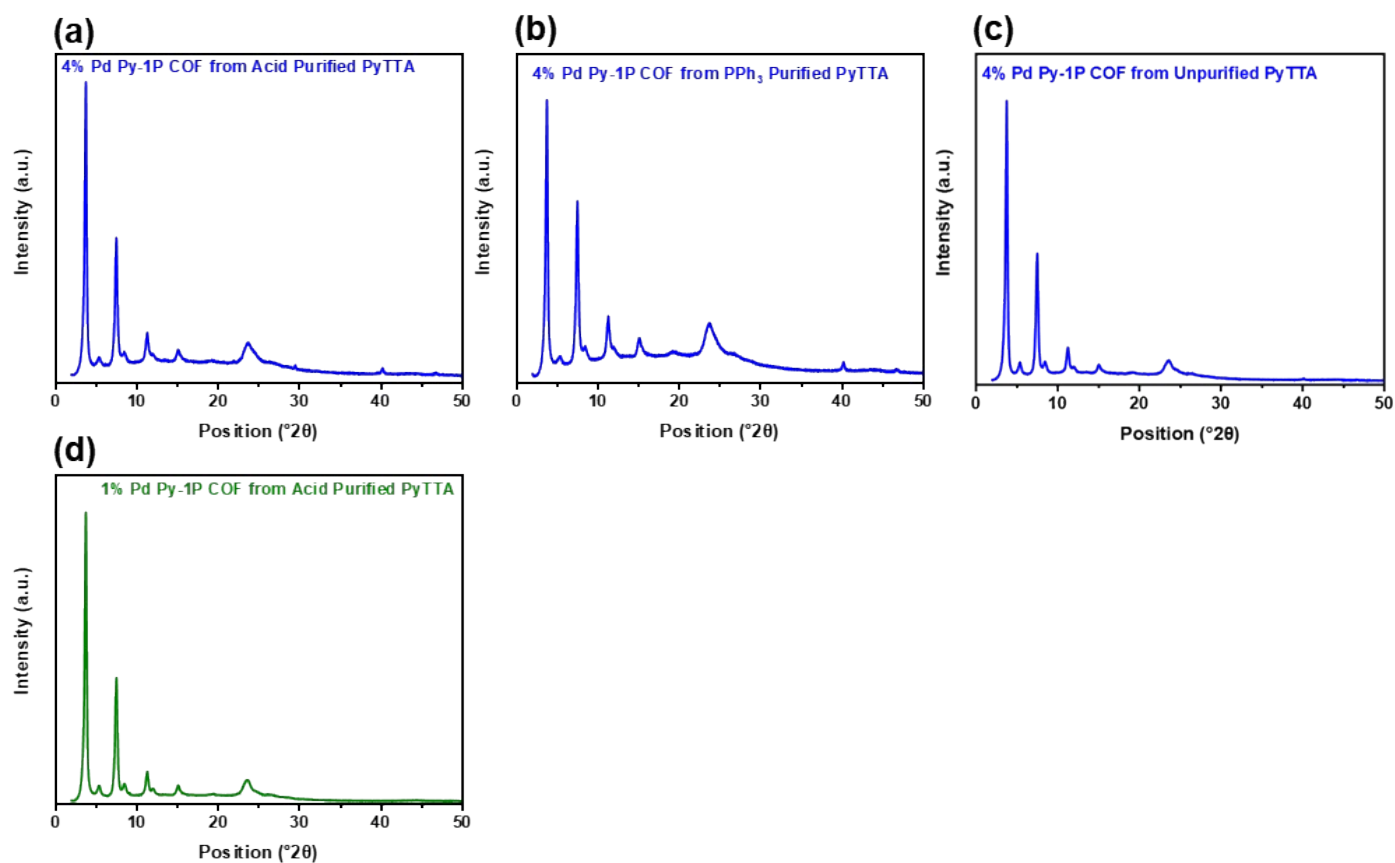

**Figure S2:** XRD spectra of (left) pristine, (middle) 4 wt. % Pd, and (right) 1 wt. % Pd Py-1P COF from (top) unpurified, (middle) acid purified, and (bottom) PPh<sub>3</sub> purified PyTTA.

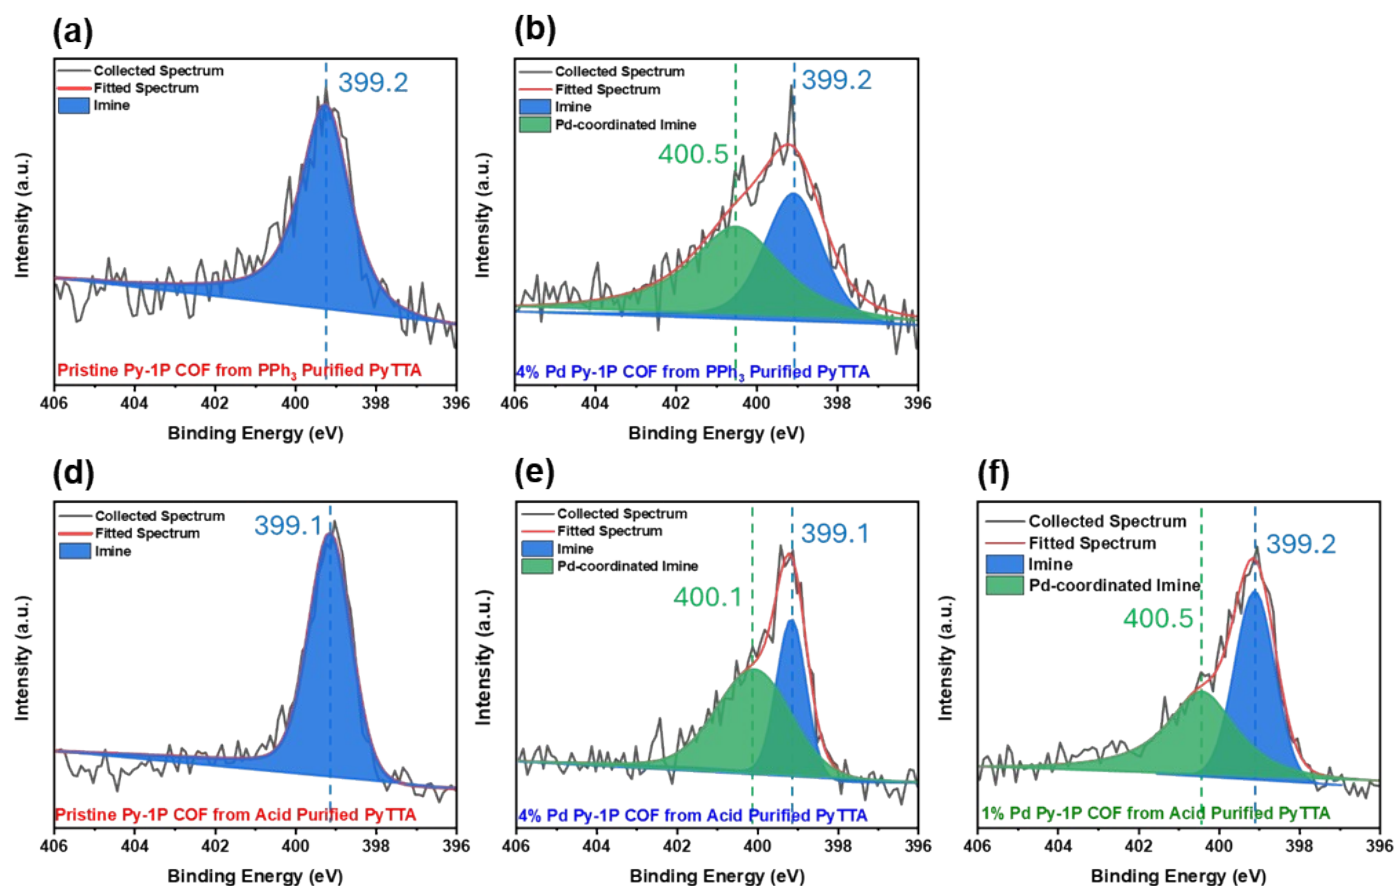

**Figure S3:** Nitrogen XPS spectra of (left) pristine, (middle) 4 wt. % Pd, and (right) 1 wt. % Pd Py-1P COF from (top)  $\text{PPh}_3$  purified and (bottom) acid purified PyTTA.

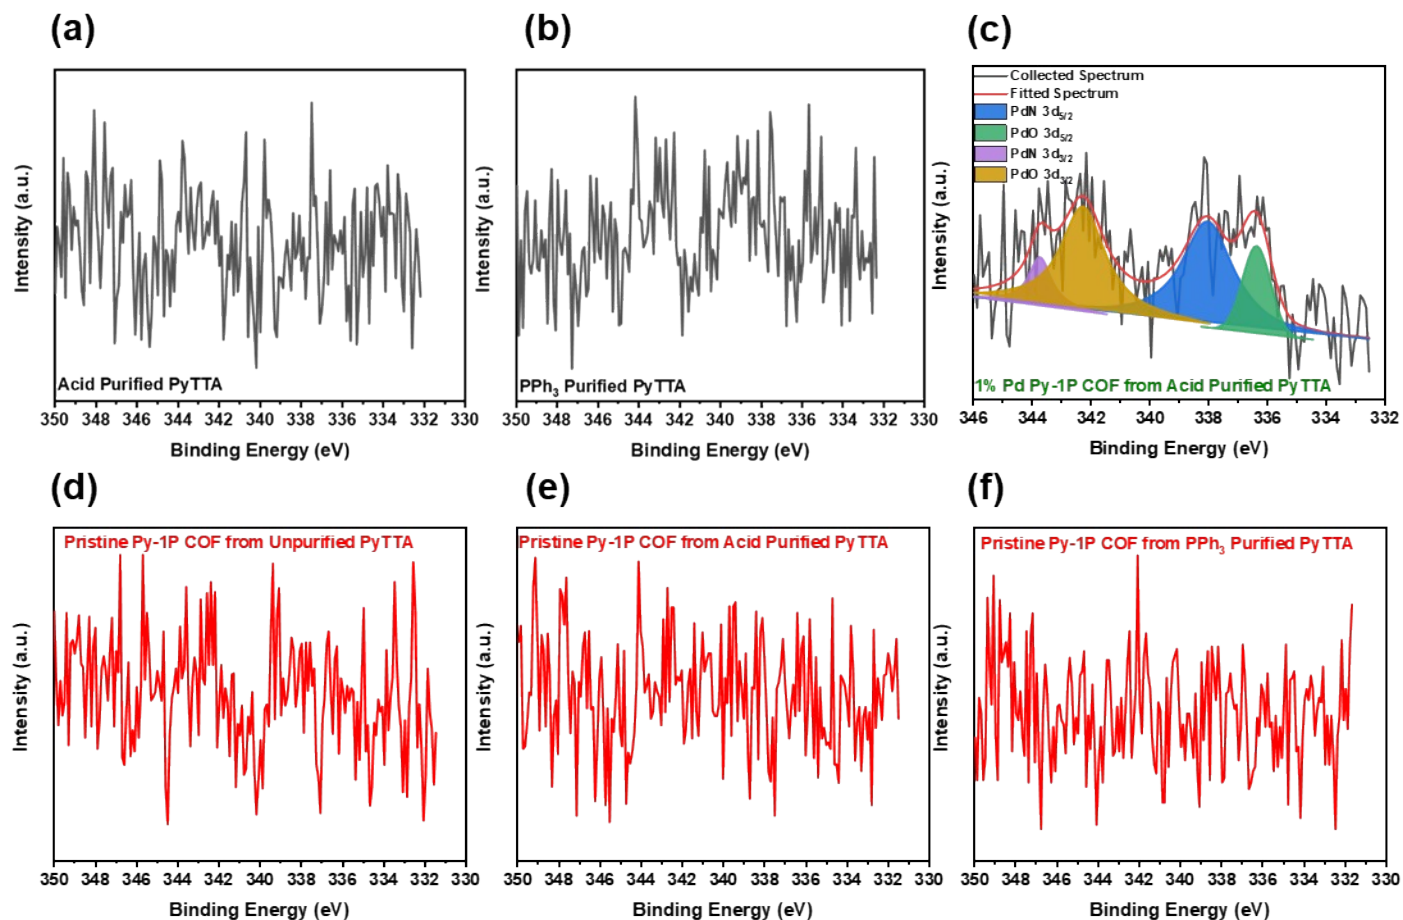

**Figure S4:** Palladium<sub>3d</sub> XPS spectra of (a) acid purified PyTTA, (b) PPh<sub>3</sub> purified PyTTA, (c) 1 wt. % Pd Py-1P COF from acid purified PyTTA, (d) pristine Py-1P COF from unpurified PyTTA, (e) pristine Py-1P COF from acid purified PyTTA and (f) pristine Py-1P COF from PPh<sub>3</sub> purified PyTTA.

### Scanning Electron Microscopy (SEM)

The samples were adhered to a stage using a carbon-based tape, coated in gold at 10 mA and 10 Pa for 120 s prior to image capturing, and collected on a Hitachi SU-70 Scanning Electron Microscope.

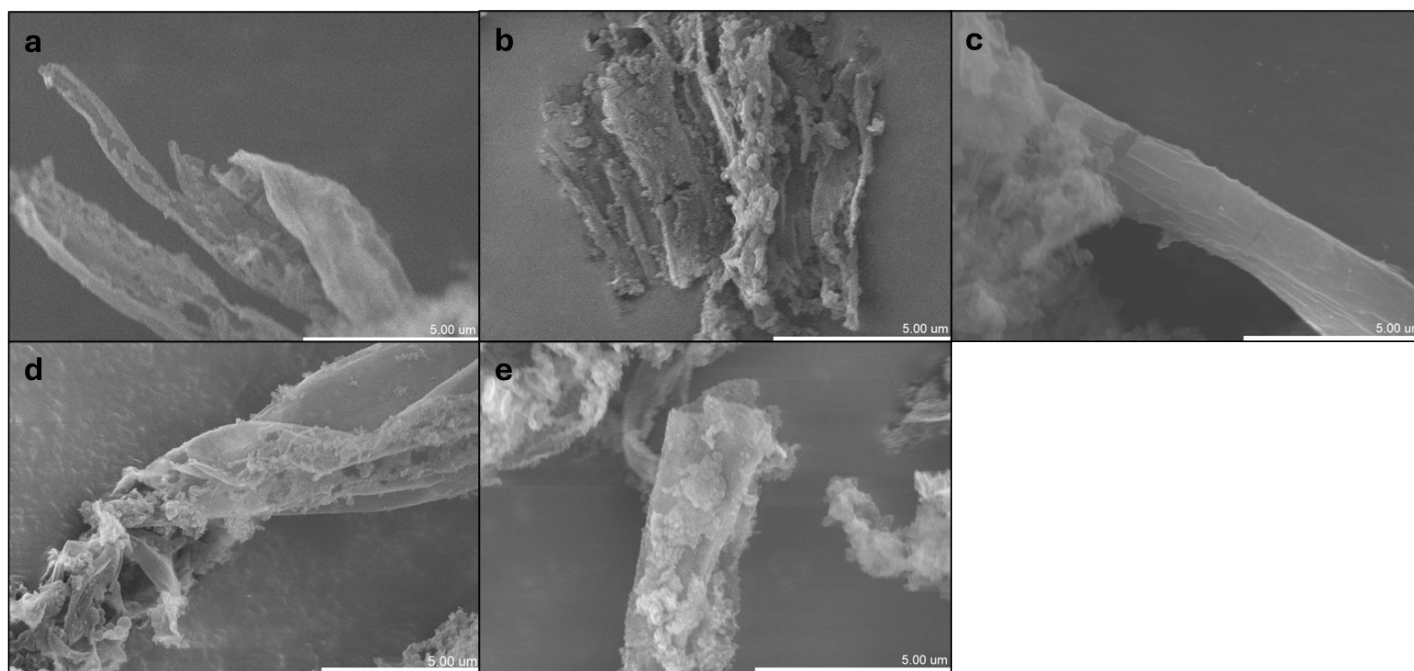

**Figure S5:** SEM images of (a) pristine Py-1P COF from acid purified PyTTA, (b) pristine Py-1P COF from PPh<sub>3</sub> purified PyTTA, (c) pristine Py-1P COF from unpurified PyTTA, (d) 1 wt. % Pd Py-1P COF from acid purified PyTTA, and (e) 4 wt. % Pd Py-1P COF from PPh<sub>3</sub> purified PyTTA.



### Energy-Dispersive X-ray (EDX) Elemental Mapping

The samples were adhered to a stage using a carbon-based tape, coated in gold at 10 mA and 10 Pa for 120 s prior to image capturing, and collected on a Hitachi SU-70 Scanning Electron Microscope.

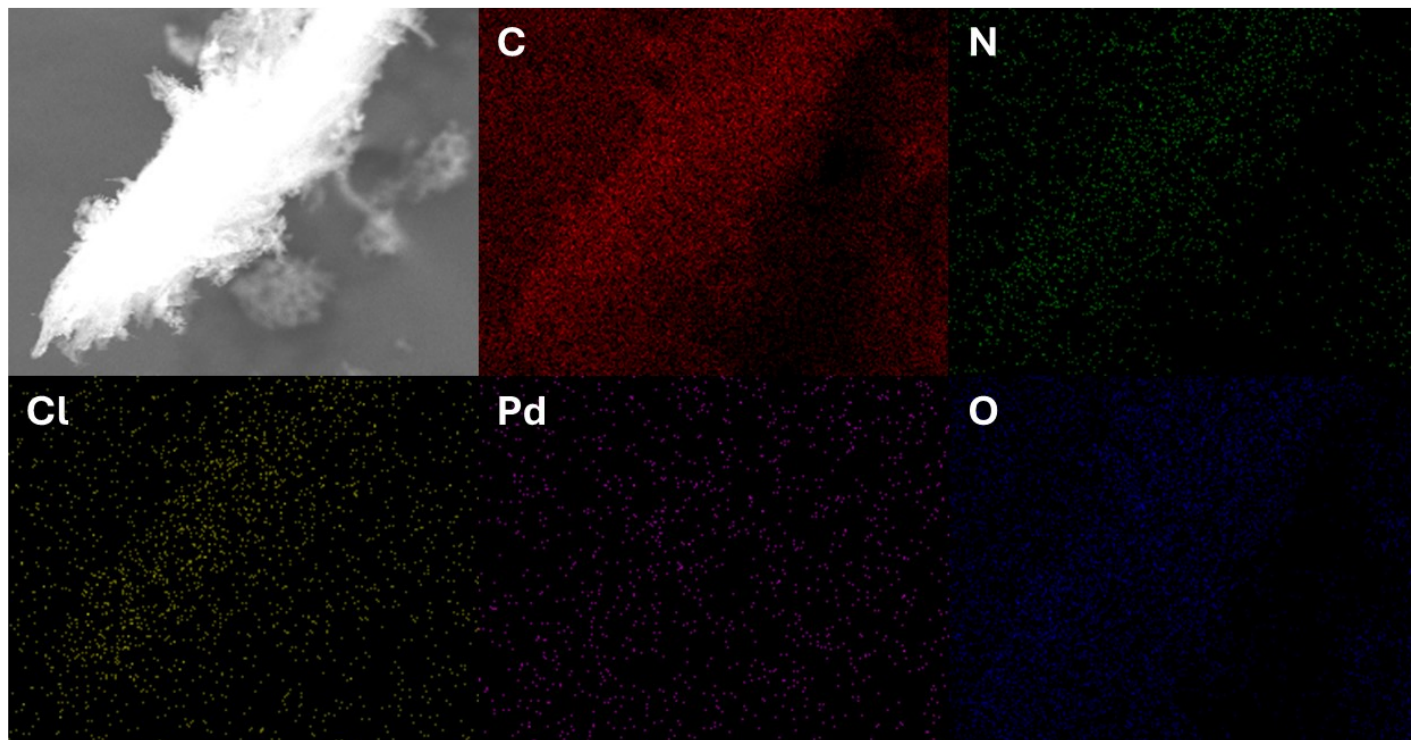

**Figure S6:** Elemental mapping of pristine Py-1P COF from acid purified PyTTA.

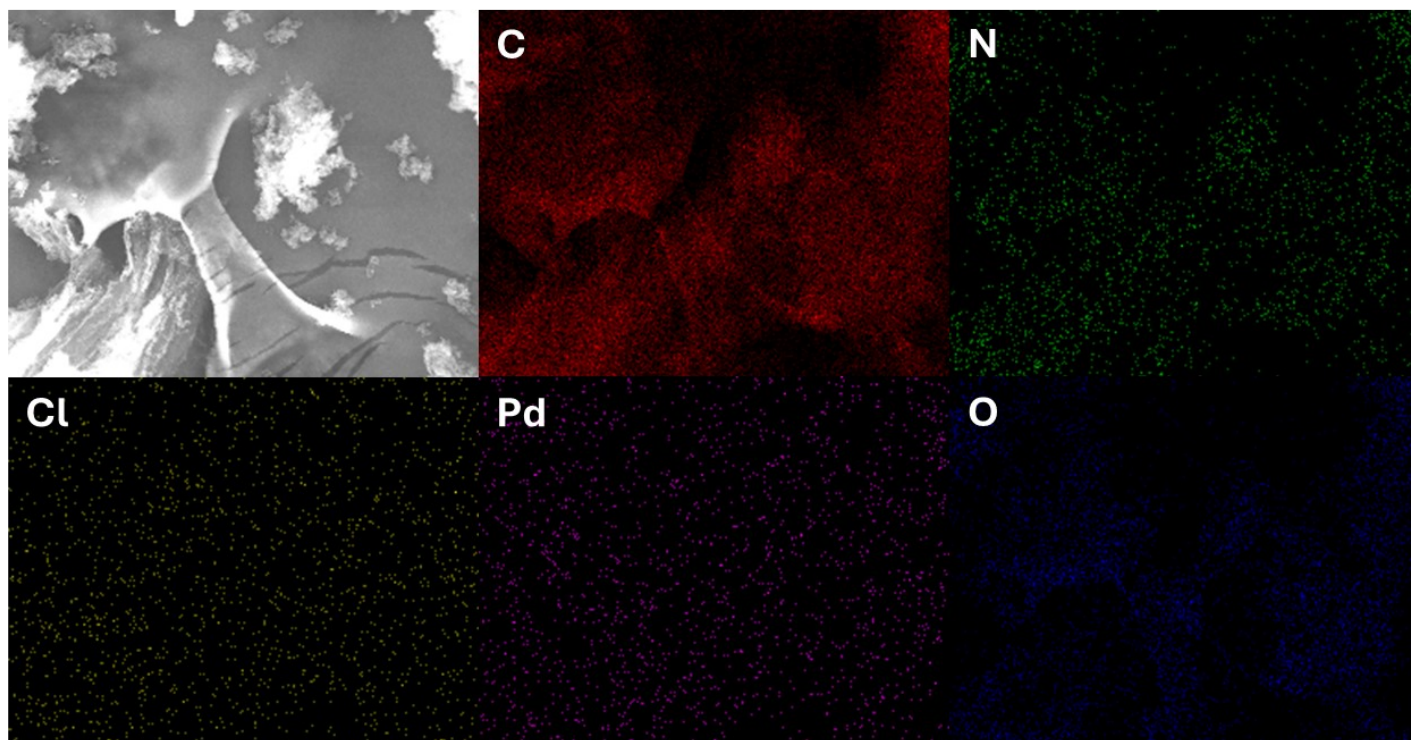

**Figure S7:** Elemental mapping of pristine Py-1P COF from PPh<sub>3</sub> purified PyTTA.



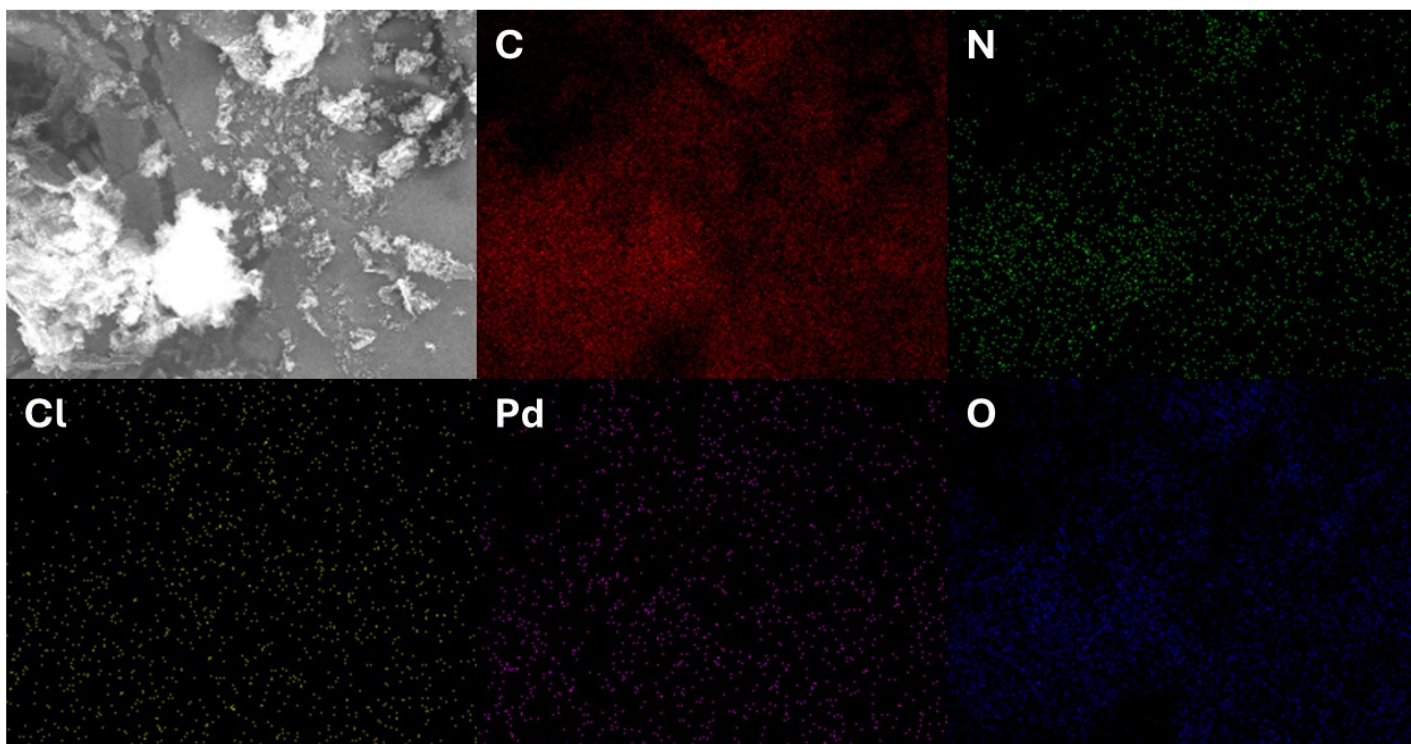

**Figure S8:** Elemental mapping of pristine Py-1P COF from unpurified PyTTA.

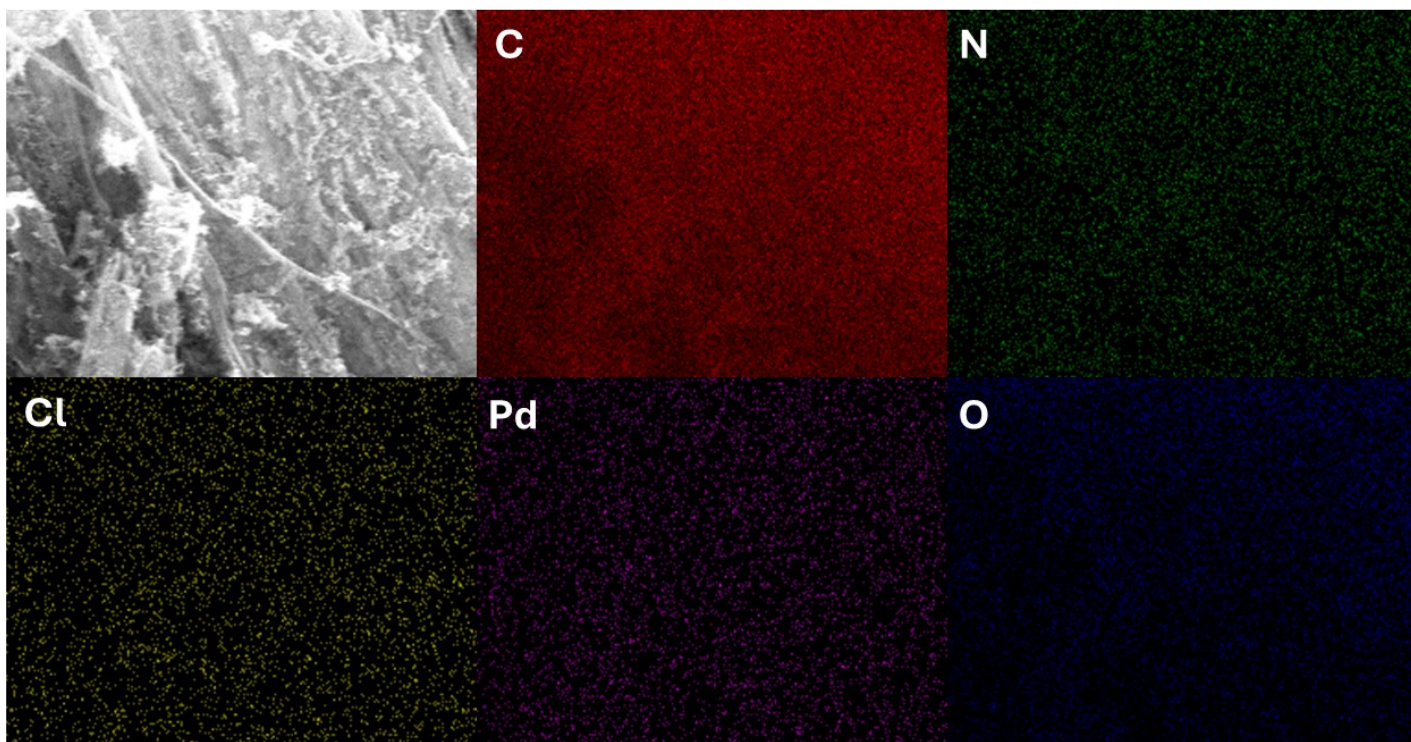

**Figure S9:** Elemental mapping of 1 wt. % Pd Py-1P COF from acid purified PyTTA.



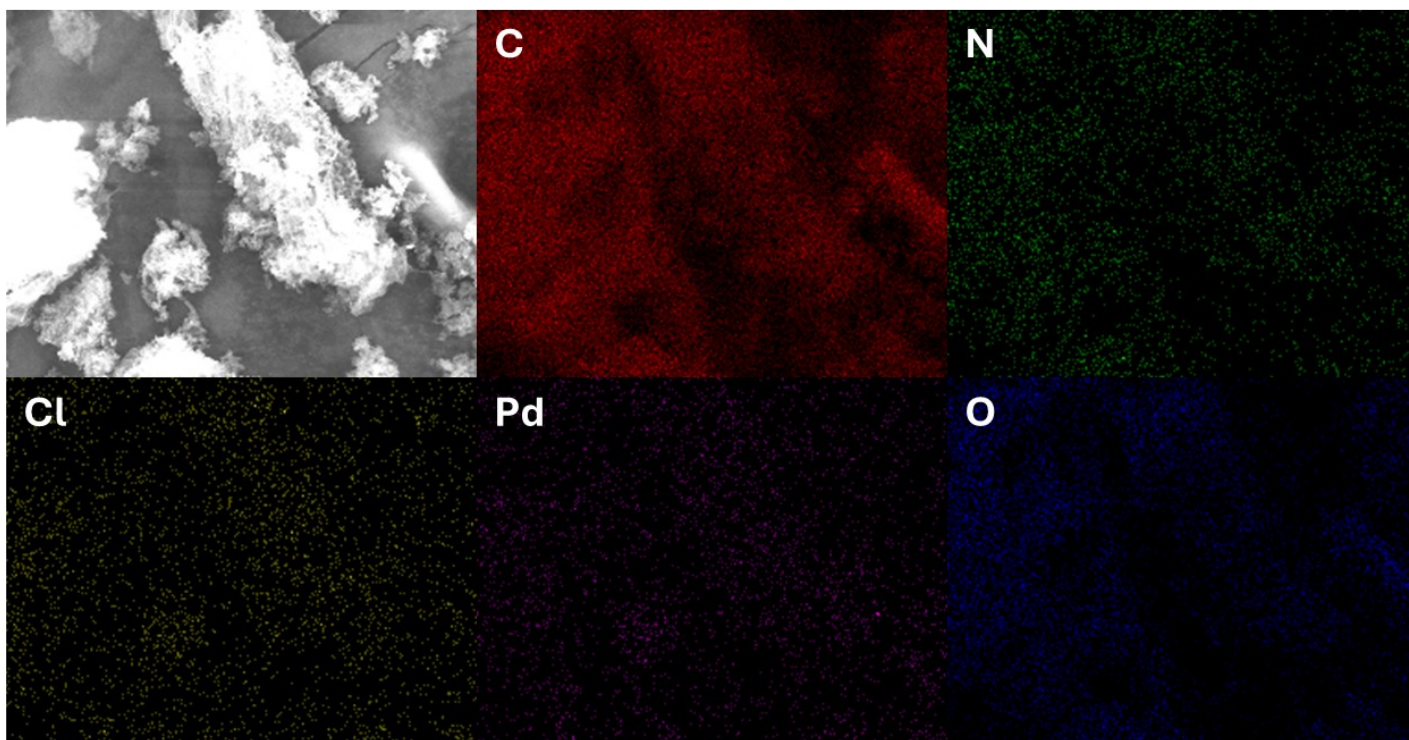

**Figure S10:** Elemental mapping of 4 wt. % Pd Py-1P COF from PPh<sub>3</sub> purified PyTTA.

Diffuse Reflectance Infrared Fourier Transform Spectroscopy (DRIFTS)

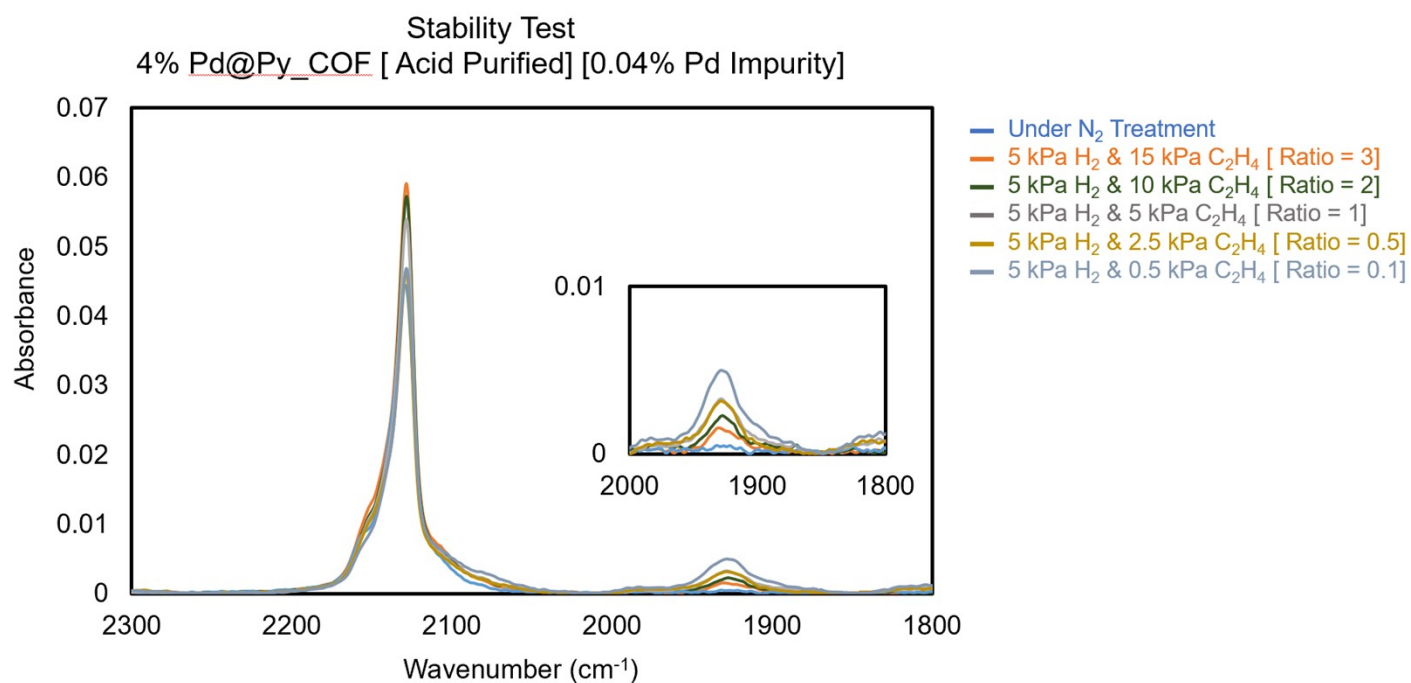

**Figure S11:** Stability test for 4 wt. % Pd Py-1P COF from acid purified PyTTA by varying hydrogen and ethylene partial pressure ratio.

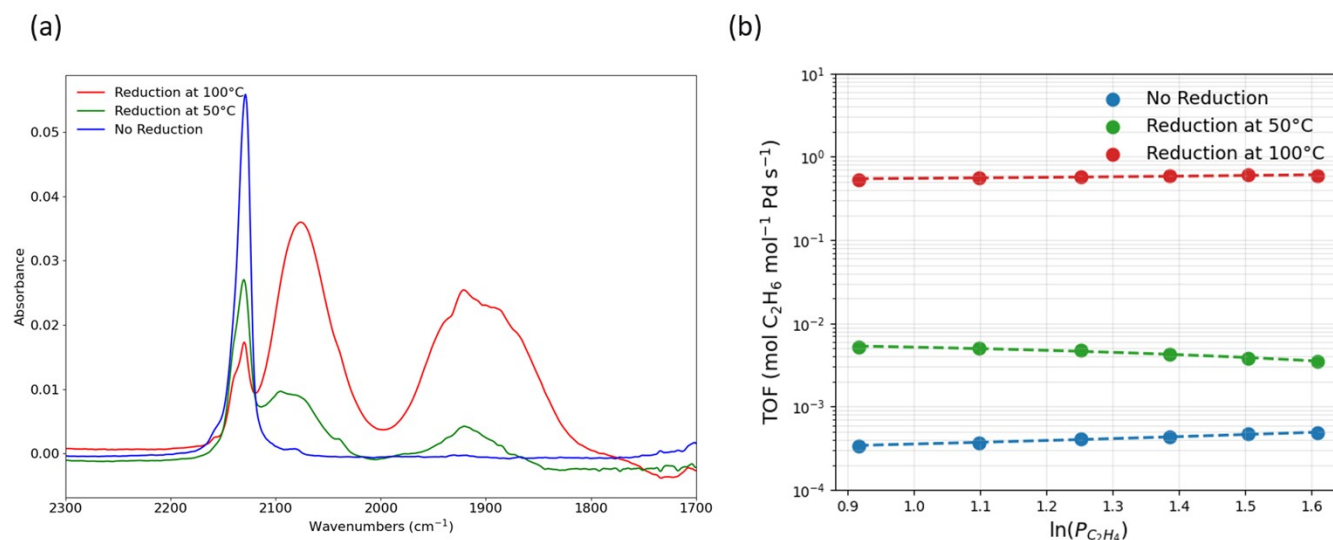

**Figure S12:** (a) CO-DRIFTS spectra of 1 wt% Pd@Py-COF [PPh<sub>3</sub> Purified] under reduction environment for two different temperatures (50 °C and 100 °C), (b) Corresponding TOF values for ethylene hydrogenation as a function of ethylene partial pressure after each pretreatment.

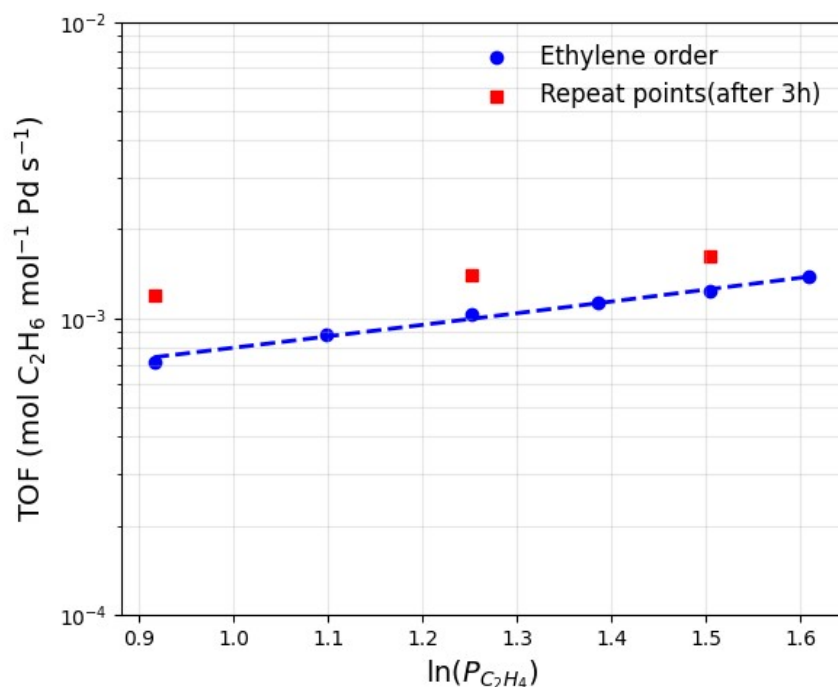

**Figure S13:** Stability test of the 1% PdCl<sub>2</sub>@Py-1P COF. Dependence of TOF on C<sub>2</sub>H<sub>4</sub> partial pressure was measured at a constant H<sub>2</sub> partial pressure of 5 kPa. The stability test was performed at the initial condition after ~3 h measurement.
